# Supplementary material for: BiVO4–Deposited MIL–101–NH2 for Efficient Photocatalytic Elimination of Cr(VI)
Source: MDPI journal article supplement (doi:10.3390/molecules28031218), 2023-01-26
Supplement: s1 [file s1]

**Supplementary information**

**BiVO<sub>4</sub>-deposited MIL-101-NH<sub>2</sub> for efficient photocatalytic elimination of Cr(VI)**

*Huiwen Sun<sup>a</sup>, Qihang Dai<sup>a</sup>, Ju Liu<sup>a</sup>, Tiantian Zhou<sup>a</sup>, Muhua Chen<sup>a</sup>, Zhengchun Cai*

*<sup>a</sup>, Xinbao Zhu<sup>a</sup>, Bo Fu<sup>a, \*</sup>*

<sup>a</sup> Jiangsu Co-Innovation Center of Efficient Processing and Utilization of Forest Resources,

Jiangsu provincial key lab for the chemistry and utilization of agro-forest biomass, College of

Chemical Engineering, Nanjing Forestry University, Nanjing 210037, China.

### *Material*

Bismuth nitrate pentahydrate ( $\text{Bi}(\text{NO}_3)_3 \cdot 5\text{H}_2\text{O}$ , 99%), Ammonium Metavanadate ( $\text{NH}_4\text{VO}_3$ , 99%), Sodium Orthovanadate Dodecahydrate ( $\text{Na}_3\text{VO}_4 \cdot 12\text{H}_2\text{O}$ , 99%), Nitric acid ( $\text{HNO}_3$ , 65-68%, Sinopharm Chemical Reagent Co., Ltd.), 2-Aminoterephthalic acid ( $\text{H}_2\text{ATA}$ , 98%), Titanium isopropoxide (TTIP, 95%), Ferric Chloride Hexahydrate ( $\text{FeCl}_3 \cdot 6\text{H}_2\text{O}$ ,  $\geq 99\%$ , Sinopharm Chemical Reagent Co., Ltd.), Methanol ( $\text{MeOH}$ ,  $\geq 99.8\%$ ), and N,N-dimethylformamide (DMF,  $\geq 99.8\%$ ) were supplied by Shanghai Macklin Biochemical Co., Ltd. and utilized as received without further treatment.

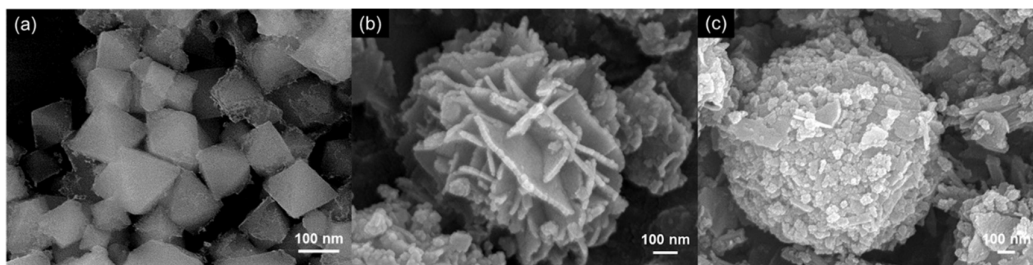

**Figure S1.** SEM image of (a)FN; (b)FNBV-1 and (c)FNBV-7.

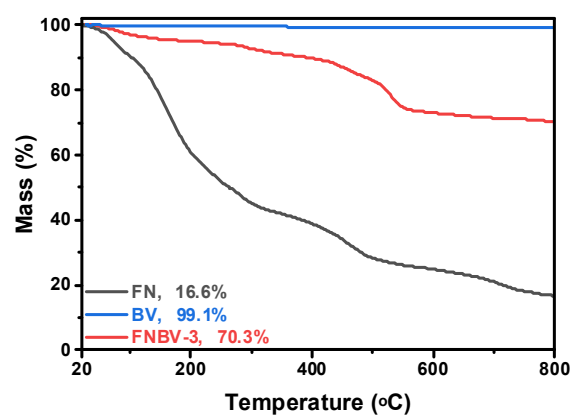

**Figure S2.** TG curves of BV, FN and FNBV-3.

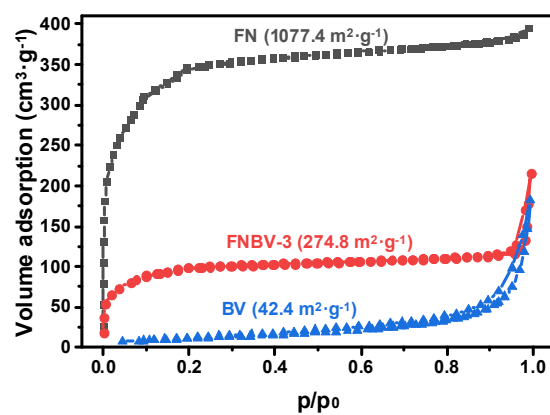

**Figure S3.** N<sub>2</sub> adsorption-desorption isotherms of FN, BV and FNBV-3.

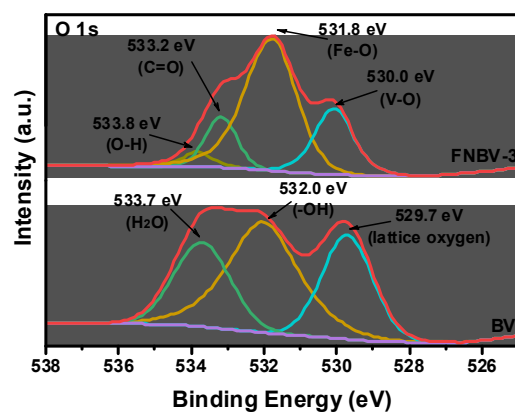

**Figure S4.** O 1sXPS spectra of BV and FNBV-3 samples.

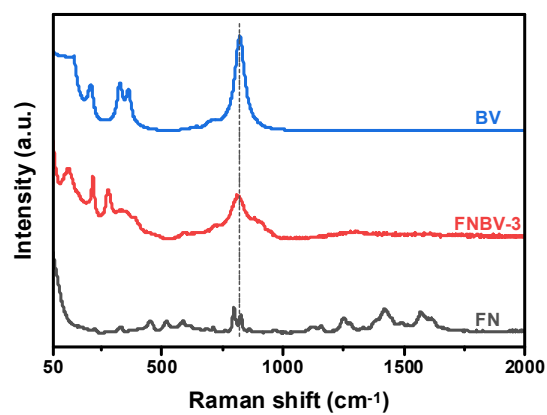

**Figure S5.** Raman spectra of FN, BV and FNBV-3.

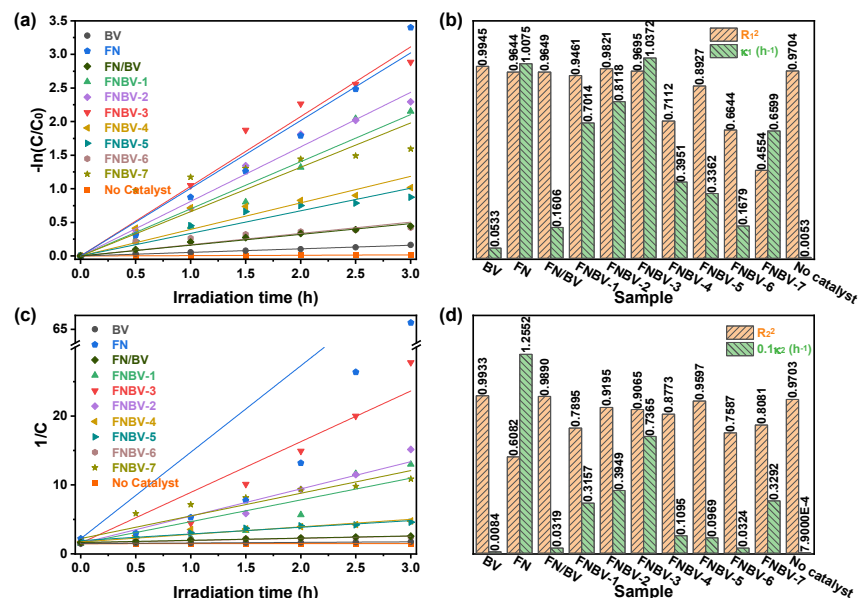

**Figure S6.** The corresponding (a, b) pseudo-first-order and (c, d) pseudo-second-order reaction kinetic linear simulation curves.

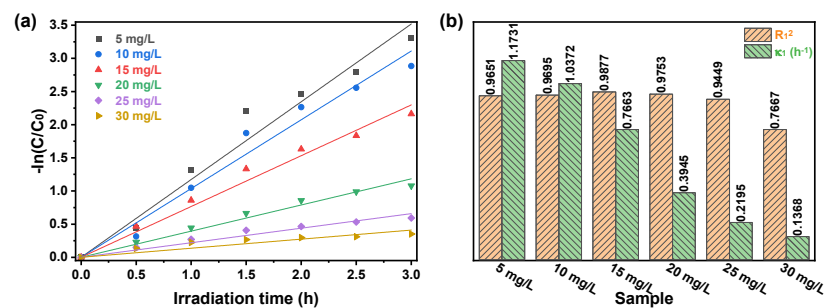

**Figure S7.** The corresponding first-order Langmuir-Hinshelwood model of reaction kinetic study.

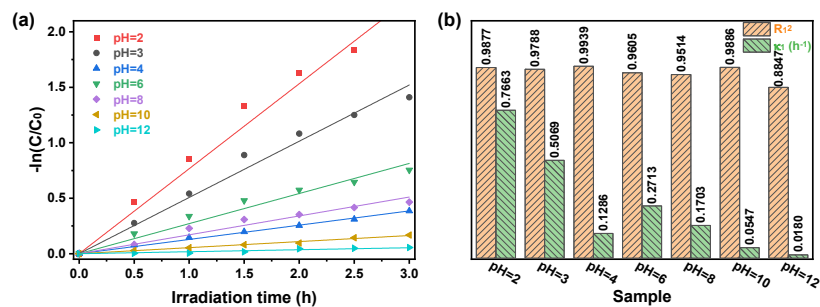

**Figure S8.** The corresponding first-order Langmuir-Hinshelwood model of reaction kinetic study.

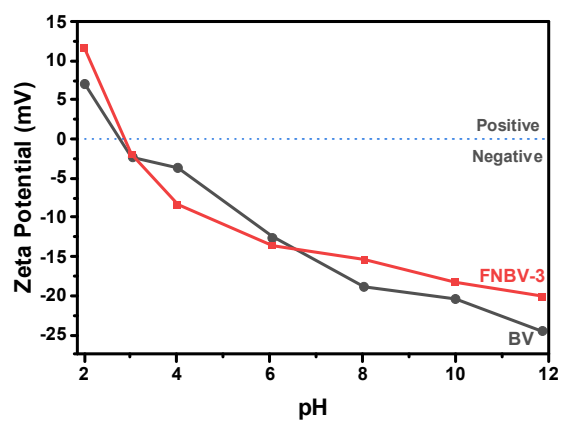

**Figure S9.** Zeta Potential measurement of BV and FNBV-3.

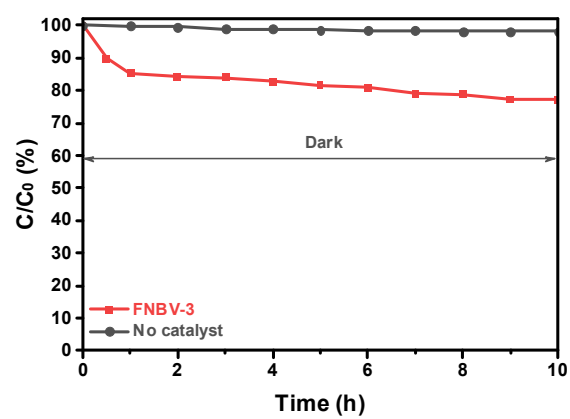

**Figure S10.** The removal performance of FNBV-3 in dark.

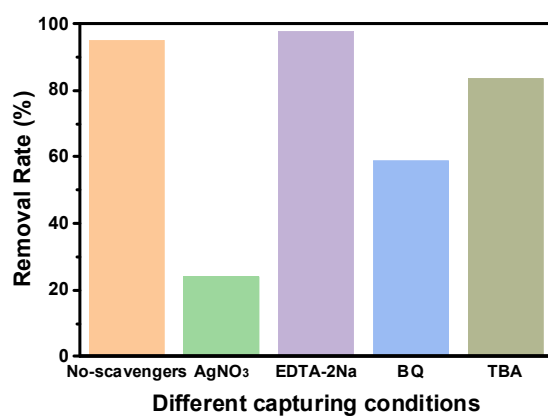

**Figure S11.** Influence of scavengers in the performance of FNBV-3 composite.

**Table S1.** Comparison of various photocatalysts efficiency in pollutants removal.

| Catalysts                                              | Morphology              | Removal<br>efficiency (%) | Catalytic conditions                                                                       | Reference |
|--------------------------------------------------------|-------------------------|---------------------------|--------------------------------------------------------------------------------------------|-----------|
| MIL-101-<br>NH <sub>2</sub> /BiVO <sub>4</sub>         | Flower-like             | 91.2                      | 180 min, 1 g·L <sup>-1</sup><br>15 mg·L <sup>-1</sup> Cr(VI)                               | This work |
| BiVO <sub>4</sub> -Fe <sub>3</sub> O <sub>4</sub>      | Irregular               | 87.1                      | 120 min, 5 g·L <sup>-1</sup><br>5 mM/L CA                                                  | [1]       |
| Fe <sub>3</sub> O <sub>4</sub> /BiVO <sub>4</sub> /CuS | Irregular               | 78.8                      | 5 mg·L <sup>-1</sup> Cr(VI)<br>90 min, 1 g·L <sup>-1</sup><br>10 mg·L <sup>-1</sup> Cr(VI) | [2]       |
| BiVO <sub>4</sub> @MoS <sub>2</sub>                    | Core-shell<br>structure | 76.5                      | 90 min, 0.4 g·L <sup>-1</sup><br>15 mg·L <sup>-1</sup> Cr(VI)                              | [3]       |
| Ce MOF/mc BiVO <sub>4</sub>                            | Irregular               | 74.7                      | 180 min, 0.1 g·L <sup>-1</sup><br>10 mg·L <sup>-1</sup> MO                                 | [4]       |
| Er-BiVO <sub>4</sub>                                   | Near-nuts               | 84                        | 180 min, 0.5 g·L <sup>-1</sup><br>10 mg·L <sup>-1</sup> MO                                 | [5]       |
| Cu <sub>2</sub> O/BiVO <sub>4</sub>                    | Plate-like              | 73                        | 150 min, 0.5 g·L <sup>-1</sup><br>2×10 <sup>-5</sup> mol·L <sup>-1</sup> MO                | [6]       |
| AgVO <sub>4</sub> /BiVO <sub>4</sub>                   | Flower-like             | 74.9                      | 150 min, 0.4 g·L <sup>-1</sup><br>15 mg·L <sup>-1</sup> Cr(VI)                             | [7]       |
| Ag/AgBr/BiVO <sub>4</sub>                              | Irregular               | 91.7                      | 60 min, 1 mM EDTA<br>10 mg·L <sup>-1</sup> Cr(VI)                                          | [8]       |



## Reference

1. Ke, T.; Guo, H.; Zhang, Y.; Liu, Y. Photoreduction of Cr(VI) in water using BiVO<sub>4</sub>-Fe<sub>3</sub>O<sub>4</sub> nano-photocatalyst under visible light irradiation. *Environ. Sci. Pollut. Res.* **2017**, *24*, 28239-28247, doi:<https://doi.org/10.1007/s11356-017-0255-0>.
2. Xu, G.; Du, M.; Zhang, J.; Li, T.; Guan, Y.; Guo, C. Facile fabrication of magnetically recyclable Fe<sub>3</sub>O<sub>4</sub>/BiVO<sub>4</sub>/CuS heterojunction photocatalyst for boosting simultaneous Cr(VI) reduction and methylene blue degradation under visible light. *J. Alloys Compd.* **2022**, *895*, 162631, doi:<https://doi.org/10.1016/j.jallcom.2021.162631>.
3. Zhao, W.; Liu, Y.; Wei, Z.; Yang, S.; He, H.; Sun, C. Fabrication of a novel p-n heterojunction photocatalyst n-BiVO<sub>4</sub>@p-MoS<sub>2</sub> with core-shell structure and its excellent visible-light photocatalytic reduction and oxidation activities. *Appl. Catal. B* **2016**, *185*, 242-252, doi:<https://doi.org/10.1016/j.apcatb.2015.12.023>.
4. Kuila, A.; Saravanan, P.; Routu, S.; Gopinath, P.; Jang, M.; Wang, C. Improved charge carrier dynamics through a type II staggered Ce MOF/mc BiVO<sub>4</sub> n-n heterojunction for enhanced visible light utilisation. *Appl. Surf. Sci.* **2021**, *553*, 149556, doi:<https://doi.org/10.1016/j.apsusc.2021.149556>.
5. Moscow, S.; Kavinkumar, V.; Sriramkumar, M.; Jothivenkatachalam, K.; Saravanan, P.; Rajamohan, N.; Vasseghian, Y.; Rajasimman, M. Impact of Erbium (Er) and Yttrium (Y) doping on BiVO<sub>4</sub> crystal structure towards the enhancement of photoelectrochemical water splitting and photocatalytic performance.

6. Yuan, Q.; Chen, L.; Xiong, M.; He, J.; Luo, S.L.; Au, C.T.; Yin, S.F. Cu<sub>2</sub>O/BiVO<sub>4</sub> heterostructures: synthesis and application in simultaneous photocatalytic oxidation of organic dyes and reduction of Cr(VI) under visible light. *Chem. Eng. J.* **2014**, 255, 394-402, doi:<https://doi.org/10.1016/j.cej.2014.06.031>.
7. Zhao, W.; Feng, Y.; Huang, H.; Zhou, P.; Li, J.; Zhang, L.; Dai, B.; Xu, J.; Zhu, F.; Sheng, N.; et al. A novel Z-scheme Ag<sub>3</sub>VO<sub>4</sub>/BiVO<sub>4</sub> heterojunction photocatalyst: Study on the excellent photocatalytic performance and photocatalytic mechanism. *Appl. Catal. B* **2019**, 245, 448-458, doi:<https://doi.org/10.1016/j.apcatb.2019.01.001>.
8. Chen, F.; Yang, Q.; Wang, Y.; Yao, F.; Ma, Y.; Huang, X.; Li, X.; Wang, D.; Zeng, G.; Yu, H. Efficient construction of bismuth vanadate-based Z-scheme photocatalyst for simultaneous Cr(VI) reduction and ciprofloxacin oxidation under visible light: Kinetics, degradation pathways and mechanism. *Chem. Eng. J.* **2018**, 348, 157-170, doi:<https://doi.org/10.1016/j.cej.2018.04.170>.
